# Supplementary material for: Acute Infection and Subsequent Subclinical Reactivation of Herpes Simplex Virus 2 after Vaginal Inoculation of Rhesus Macaques
Source: PubMed Central journal article supplement (PMC6321901; doi:10.1128/jvi.01574-18), 2019-01-04
Supplement: 94b75984269d77a0a12e4907dcf1e037_JVI.01574-18-s0001.pdf [file 94b75984269d77a0a12e4907dcf1e037_JVI.01574-18-s0001.pdf]

**Supplemental Table 1. HSV-2 inoculation and sample collection schedule: Group 1**

| Days after HSV2 inoculation | Intervention/Sample |                                   |                  |       |                 |                |                       | 1 |
|-----------------------------|---------------------|-----------------------------------|------------------|-------|-----------------|----------------|-----------------------|---|
|                             | HSV inoculation     | cervico-vaginal swab <sup>a</sup> | CVL <sup>a</sup> | Blood | cervical biopsy | vaginal biopsy | vulva/perineal biopsy | 2 |
| 0                           | X                   | X                                 | X                | X     | X               | X              | X                     |   |
| 1                           |                     | X                                 | X                | X     |                 |                |                       |   |
| 2                           |                     | X                                 | X                | X     |                 |                |                       |   |
| 3                           |                     | X                                 | X                |       |                 |                |                       |   |
| 4                           |                     | X                                 | X                |       |                 |                |                       |   |
| 5                           |                     |                                   |                  |       |                 |                |                       |   |
| 6                           |                     |                                   |                  |       |                 |                |                       |   |
| 7                           | X                   | X                                 | X                | X     | X               | X              | X                     |   |
| 8                           |                     | X                                 | X                |       |                 |                |                       |   |
| 9                           |                     | X                                 | X                |       |                 |                |                       |   |
| 10                          |                     | X                                 | X                |       |                 |                |                       |   |
| 11                          |                     | X                                 | X                |       |                 |                |                       |   |
| 12                          |                     |                                   |                  |       |                 |                |                       |   |
| 13                          |                     |                                   |                  |       |                 |                |                       |   |
| 14                          | X                   | X                                 | X                | X     |                 |                |                       |   |
| 15                          |                     | X                                 | X                |       |                 |                |                       |   |
| 16                          |                     | X                                 | X                |       |                 |                |                       |   |
| 17                          |                     | X                                 | X                |       |                 |                |                       |   |
| 18                          |                     | X                                 | X                |       |                 |                |                       |   |
| 19                          |                     |                                   |                  |       |                 |                |                       |   |
| 20                          |                     |                                   |                  |       |                 |                |                       |   |
| 21                          | X                   | X                                 | X                | X     |                 |                |                       |   |
| 22                          |                     | X                                 | X                |       |                 |                |                       |   |
| 23                          |                     | X                                 | X                |       |                 |                |                       |   |
| 24                          |                     | X                                 | X                |       |                 |                |                       |   |
| 25                          |                     | X                                 | X                |       |                 |                |                       |   |
| 26                          |                     |                                   |                  |       |                 |                |                       |   |
| 27                          |                     |                                   |                  |       |                 |                |                       |   |
| 28                          |                     | X                                 | X                | X     |                 |                |                       |   |
| 29                          |                     | X                                 | X                |       |                 |                |                       |   |
| 30                          |                     | X                                 | X                |       |                 |                |                       |   |
| 31                          |                     | X                                 | X                |       |                 |                |                       |   |
| 32                          |                     | X                                 | X                |       |                 |                |                       |   |
| 33                          |                     |                                   |                  |       |                 |                |                       |   |
| 34                          |                     |                                   |                  |       |                 |                |                       |   |
| 35                          |                     | X                                 | X                | X     |                 |                |                       |   |
| 36                          |                     | X                                 | X                |       |                 |                |                       |   |
| 37                          |                     | X                                 | X                |       |                 |                |                       |   |
| 38                          |                     | X                                 | X                |       |                 |                |                       |   |
| 39                          |                     | X                                 | X                |       |                 |                |                       |   |
| 40                          |                     |                                   |                  |       |                 |                |                       |   |
| 41                          |                     |                                   |                  |       |                 |                |                       |   |
| 42                          |                     | X                                 | X                | X     |                 |                |                       |   |
| 43                          |                     | X                                 | X                |       |                 |                |                       |   |
| 44                          |                     | X                                 | X                |       |                 |                |                       |   |
| 45                          |                     | X                                 | X                |       |                 |                |                       |   |
| 46                          |                     | X                                 | X                |       |                 |                |                       |   |
| 47                          |                     |                                   |                  |       |                 |                |                       |   |
| 48                          |                     |                                   |                  |       |                 |                |                       |   |
| 49                          |                     | X                                 | X                | X     |                 |                |                       |   |
| 50                          |                     | X                                 | X                |       |                 |                |                       |   |
| 51                          |                     | X                                 | X                |       |                 |                |                       |   |
| 52                          |                     | X                                 | X                |       |                 |                |                       |   |
| 54                          |                     | X                                 | X                |       |                 |                |                       |   |
| 53                          |                     |                                   |                  |       |                 |                |                       |   |
| 55                          |                     |                                   |                  |       |                 |                |                       |   |
| 56                          | X                   | X                                 | X                | X     |                 |                |                       |   |
| 57                          |                     | X                                 | X                |       |                 |                |                       |   |
| 58                          |                     | X                                 | X                |       |                 |                |                       |   |
| 59                          |                     | X                                 | X                |       |                 |                |                       |   |
| 60                          |                     | X                                 | X                |       |                 |                |                       |   |
| 61                          |                     |                                   |                  |       |                 |                |                       |   |
| 62                          |                     |                                   |                  |       |                 |                |                       |   |
| 63                          |                     | X                                 | X                | X     |                 |                |                       |   |
| 64                          |                     | X                                 | X                |       |                 |                |                       |   |
| 65                          |                     | X                                 | X                |       |                 |                |                       |   |
| 66                          |                     | X                                 | X                |       |                 |                |                       |   |
| 67                          |                     | X                                 | X                |       |                 |                |                       |   |
| 68                          |                     |                                   |                  |       |                 |                |                       |   |
| 69                          |                     |                                   |                  |       |                 |                |                       |   |
| 70                          |                     | X                                 | X                | X     |                 |                |                       |   |
| 71                          |                     | X                                 | X                |       |                 |                |                       |   |
| 72                          |                     | X                                 | X                |       |                 |                |                       |   |

a = collected twice daily in the Am and PM with an approximately a 6 hour interval

**Supplemental Table 2. HSV-2 inoculation and sample collection schedule: Groups 2-5**

| Days after HSV2 inoculation | Intervention/Sample |                                   |                  |       |                 |                |                       |
|-----------------------------|---------------------|-----------------------------------|------------------|-------|-----------------|----------------|-----------------------|
|                             | HSV inoculation     | cervico-vaginal swab <sup>a</sup> | CVL <sup>a</sup> | Blood | cervical biopsy | vaginal biopsy | vulva/perineal biopsy |
| 0                           | X                   | X                                 | X                | X     | X               | X              | X                     |
| 1                           |                     | X                                 | X                | X     |                 |                |                       |
| 2                           |                     | X                                 | X                | X     |                 |                |                       |
| 3                           |                     | X                                 | X                |       |                 |                |                       |
| 4                           |                     | X                                 | X                |       |                 |                |                       |
| 5                           |                     |                                   |                  |       |                 |                |                       |
| 6                           |                     |                                   |                  |       |                 |                |                       |
| 7                           |                     | X                                 | X                | X     | X               | X              | X                     |
| 8                           |                     | X                                 | X                |       |                 |                |                       |
| 9                           |                     | X                                 | X                |       |                 |                |                       |
| 10                          |                     | X                                 | X                |       |                 |                |                       |
| 11                          |                     | X                                 | X                |       |                 |                |                       |
| 12                          |                     |                                   |                  |       |                 |                |                       |
| 13                          |                     |                                   |                  |       |                 |                |                       |
| 14                          |                     | X                                 | X                | X     |                 |                |                       |
| 15                          |                     | X                                 | X                |       |                 |                |                       |
| 16                          |                     | X                                 | X                |       |                 |                |                       |
| 17                          |                     | X                                 | X                |       |                 |                |                       |
| 18                          |                     | X                                 | X                |       |                 |                |                       |
| 19                          |                     |                                   |                  |       |                 |                |                       |
| 20                          |                     |                                   |                  |       |                 |                |                       |
| 21                          |                     | X                                 | X                | X     |                 |                |                       |
| 22                          |                     | X                                 | X                |       |                 |                |                       |
| 23                          |                     | X                                 | X                |       |                 |                |                       |
| 24                          |                     | X                                 | X                |       |                 |                |                       |
| 25                          |                     | X                                 | X                |       |                 |                |                       |
| 26                          |                     |                                   |                  |       |                 |                |                       |
| 27                          |                     |                                   |                  |       |                 |                |                       |
| 28                          | X                   | X                                 | X                | X     |                 |                |                       |
| 29                          |                     | X                                 | X                |       |                 |                |                       |
| 30                          |                     | X                                 | X                |       |                 |                |                       |
| 31                          |                     | X                                 | X                |       |                 |                |                       |
| 32                          |                     | X                                 | X                |       |                 |                |                       |
| 33                          |                     |                                   |                  |       |                 |                |                       |
| 34                          |                     |                                   |                  |       |                 |                |                       |
| 35                          |                     | X                                 | X                | X     |                 |                |                       |
| 36                          |                     | X                                 | X                |       |                 |                |                       |
| 37                          |                     | X                                 | X                |       |                 |                |                       |
| 38                          |                     | X                                 | X                |       |                 |                |                       |
| 39                          |                     | X                                 | X                |       |                 |                |                       |
| 40                          |                     |                                   |                  |       |                 |                |                       |
| 41                          |                     |                                   |                  |       |                 |                |                       |
| 42                          |                     | X                                 | X                | X     |                 |                |                       |
| 43                          |                     | X                                 | X                |       |                 |                |                       |
| 44                          |                     | X                                 | X                |       |                 |                |                       |
| 45                          |                     | X                                 | X                |       |                 |                |                       |
| 46                          |                     | X                                 | X                |       |                 |                |                       |
| 47                          |                     |                                   |                  |       |                 |                |                       |
| 48                          |                     |                                   |                  |       |                 |                |                       |
| 49                          |                     | X                                 | X                | X     |                 |                |                       |
| 50                          |                     | X                                 | X                |       |                 |                |                       |

a = collected twice daily in the Am and PM with a 4 - 6 hour interval between samples

3

4

**Supplemental Table 3. HSV-2 specific antibody responses in plasma collected from day 42-350 after HSV-2 inoculation.**

| Animal Number | Whole virus ELISA <sup>a</sup> | Western blot <sup>b</sup> | HerpeSelect 2 ELISA <sup>c</sup> | Luminex Assay <sup>d</sup> |
|---------------|--------------------------------|---------------------------|----------------------------------|----------------------------|
| 34806         | -                              | -                         | -                                | -                          |
| 34889         | -                              | -                         | -                                | + <sup>e</sup>             |
| 35667         | -                              | -                         | -                                | -                          |
| 38420         | -                              | -                         | -                                | -                          |
|               |                                |                           |                                  |                            |
| 33991         | ND                             | ND                        | -                                | -                          |
| 39406         | ND                             | ND                        | -                                | + <sup>e</sup>             |
| 33869         | ND                             | ND                        | -                                | -                          |
| 34099         | ND                             | ND                        | -                                | -                          |
| 35633         | ND                             | ND                        | +                                | + <sup>e</sup>             |
| 37957         | ND                             | ND                        | -                                | -                          |
|               |                                |                           |                                  |                            |
| 38775         | ND                             | ND                        | -                                | ND                         |
| 38769         | ND                             | ND                        | -                                | ND                         |
| 40371         | ND                             | ND                        | +                                | ND                         |
| 33993         | ND                             | ND                        | -                                | ND                         |
| 31602         | ND                             | ND                        | -                                | ND                         |
| 38953         | ND                             | ND                        | -                                | ND                         |
|               |                                |                           |                                  |                            |

a = ELISA to detect IgG antibodies to UV-inactivated disrupted HSV-2 virions. After OD values from mock virus prep coated wells were subtracted from OD values of HSV-2 coated wells, there must be a 2 fold increase in OD from the pre-inoculation sample to the post inoculation sample (> 42 days PI) for an animal to be considered positive.

b = HSV-2 western blot to detect IgG antibodies to electrophoretically separated HSV-2 proteins. There must be 3 bands at appropriate locations in the blots incubated with the post inoculation plasma sample (> 42 days PI) for an animal to be considered positive.

c = HerpeSelect 2 ELISA to detect IgG antibodies to the glycoprotein G of HSV-2. There must be a 2-fold increase in OD from the pre-inoculation sample to the post inoculation sample (> 42 days PI) for an animal to be considered positive.

d = Luminex based assay to detect IgG antibodies to the glycoprotein J, glycoprotein D, UL25, UL19, and ICP47 of HSV-2 separately. There must be a 2 fold increase in MFI x dilution factor from the pre-inoculation sample to the post inoculation sample (> 42 days PI) for an animal to be considered positive.

e = The positive responses in all 3 animals was due to detection of anti-gD IgG antibodies
